# Supplementary material for: Quantitative Assessment of Antibody Internalization with Novel Monoclonal Antibodies against Alexa Fluorophores
Source: PubMed Central journal article supplement (PMC4403856; doi:10.1371/journal.pone.0124708), 2015-04-20
Supplement: pone.0124708.s001.pdf [file pone.0124708.s001.pdf]

**A**

| Antibody    | $K_D$ (nM)      | $k_{on}$ ( $\times 10^5 M^{-1} s^{-1}$ ) | $k_{dis}$ ( $\times 10^{-3} s^{-1}$ ) |
|-------------|-----------------|------------------------------------------|---------------------------------------|
| 1C1         | 110 $\pm$ 9     | 0.93 $\pm$ 0.05                          | 10.3 $\pm$ 0.6                        |
| 1C1-A488    | 96.9 $\pm$ 13.0 | 1.12 $\pm$ 0.09                          | 10.8 $\pm$ 1.1                        |
| 1C1-A488_v2 | 115 $\pm$ 42    | 1.39 $\pm$ 0.13                          | 15.7 $\pm$ 4.4                        |
| 1C1-A594    | 62.3 $\pm$ 26.7 | 1.75 $\pm$ 0.06                          | 8.72 $\pm$ 1.04                       |
| 3035        | 3.66 $\pm$ 0.16 | 3.33 $\pm$ 0.11                          | 1.22 $\pm$ 0.04                       |
| 3035-A488   | 3.40 $\pm$ 0.15 | 3.75 $\pm$ 0.21                          | 1.27 $\pm$ 0.03                       |
| 3035-A594   | 1.87 $\pm$ 0.36 | 4.79 $\pm$ 0.73                          | 0.88 $\pm$ 0.06                       |

**B**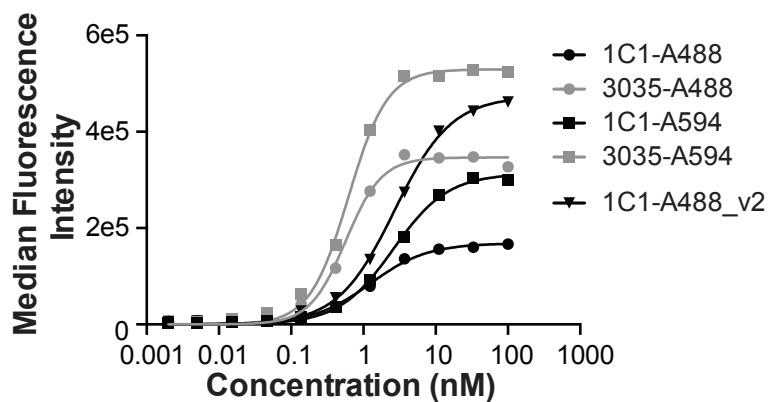

| Antibody Conjugate | $K_d$ [nM] | 95% CI (nM) |
|--------------------|------------|-------------|
| 1C1-A488           | 1.23       | 0.92 - 1.53 |
| 3035-A488          | 0.57       | 0.46 - 0.67 |
| 1C1-A594           | 2.60       | 2.25 - 2.95 |
| 3035-A594          | 0.62       | 0.55 - 0.70 |
| 1C1-A488_v2        | 2.70       | 2.34 - 3.06 |

**C**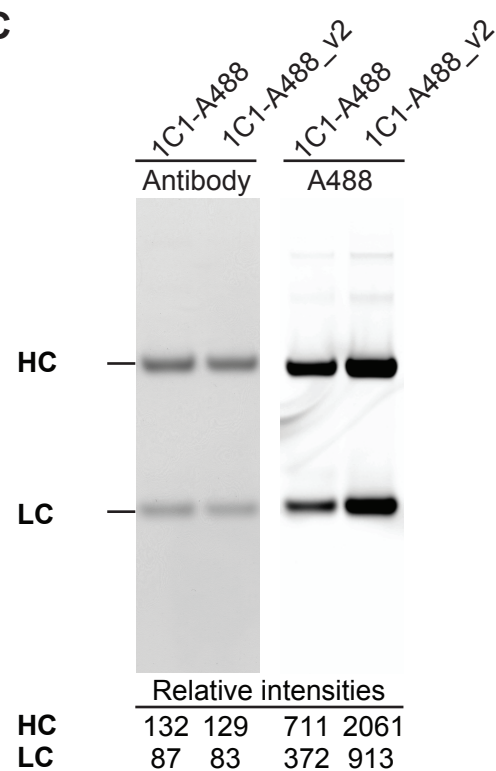**D**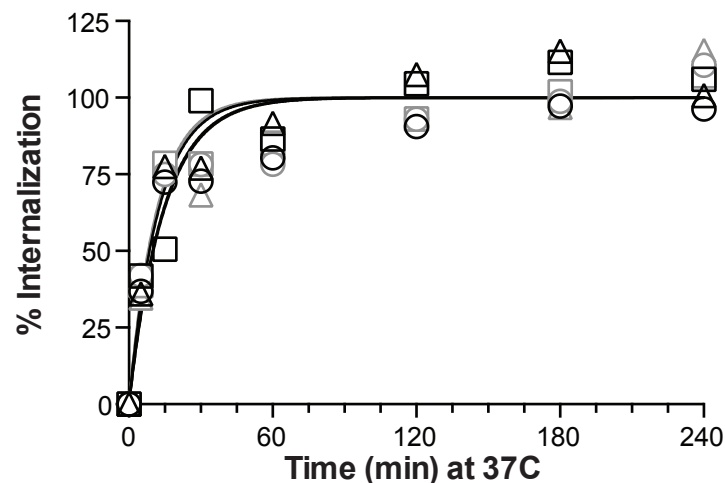

|                    | Quencher            | Half-time (min) | 95% CI (min) |
|--------------------|---------------------|-----------------|--------------|
| <b>1C1-A488</b>    | ○ Anti-Alexa488 pAb | 10              | [7 - 20]     |
|                    | □ Anti-Alexa488-19A | 10              | [7 - 20]     |
|                    | △ Anti-Alexa488-30A | 9               | [6 - 15]     |
| <b>1C1-A488_v2</b> | ○ Anti-Alexa488 pAb | 8               | [5 - 18]     |
|                    | □ Anti-Alexa488-19A | 8               | [5 - 14]     |
|                    | △ Anti-Alexa488-30A | 10              | [6 - 23]     |

### S1 Fig. Apparent affinities of anti-EphA2 mAbs and internalization of anti-EphA2 mAbs with different dye loads

(A) Kinetic measurement values for naked and dye-conjugated mAbs. The standard deviation is derived from a triplicate data set. (B) Apparent  $K_d$  of 1C1 and 3035 conjugated to either A488 or A594. For 1C1, the apparent  $K_d$  for a second A488 conjugate, 1C1-A488\_v2, is also shown. (C) Coomassie stain (antibody) and A488 dye load of two 1C1-A488 conjugates. While 1C1-A488 had relative intensities of 370 on the light chain and 910 on the heavy chain, the second batch of 1C1-A488 (1C1-A488\_v2) had relative intensities of 710 on the light chain and 2060 on the heavy chain. (D) Percent internalization of two 1C1-A488 conjugates with a 3-fold difference in dye load between the two conjugates over a 4-hr time course.
