# Supplementary material for: Quantitative Assessment of Antibody Internalization with Novel Monoclonal Antibodies against Alexa Fluorophores
Source: PubMed Central journal article supplement (PMC4403856; doi:10.1371/journal.pone.0124708), 2015-04-20
Supplement: pone.0124708.s002.pdf [file pone.0124708.s002.pdf]

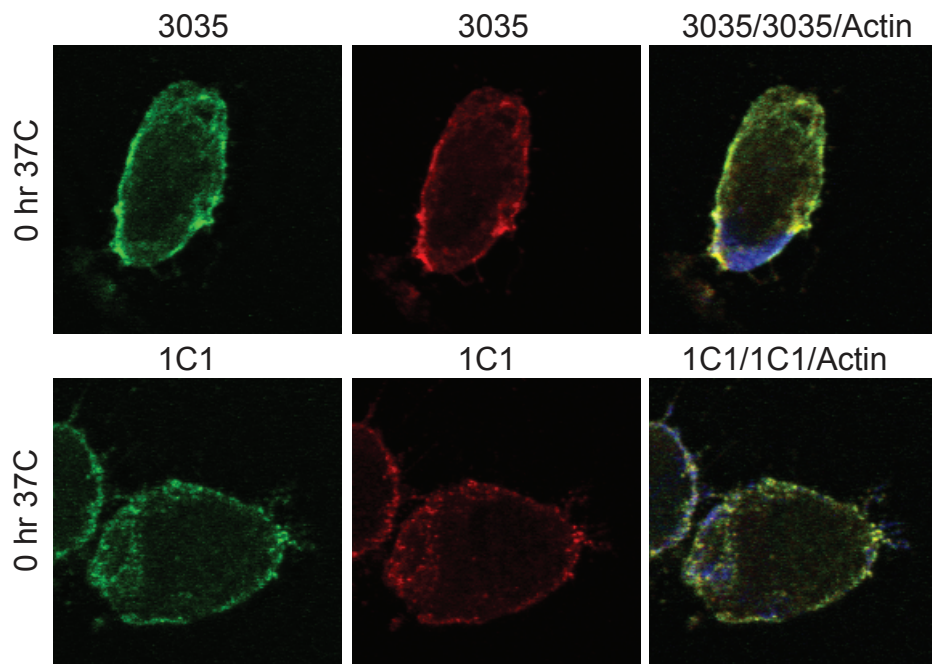

**S2 Fig. Immunofluorescence for anti-EphA2 mAb in two channels.**

Surface-bound 3035 or 1C1 on PC-3 cells was processed for immunofluorescence and detected in two channels (green and red) by confocal microscopy. The actin cytoskeleton was detected with Alexa Fluor 647 Phalloidin.
