# Supplementary material for: Quantitative Assessment of Antibody Internalization with Novel Monoclonal Antibodies against Alexa Fluorophores
Source: PubMed Central journal article supplement (PMC4403856; doi:10.1371/journal.pone.0124708), 2015-04-20
Supplement: pone.0124708.s003.pdf [file pone.0124708.s003.pdf]

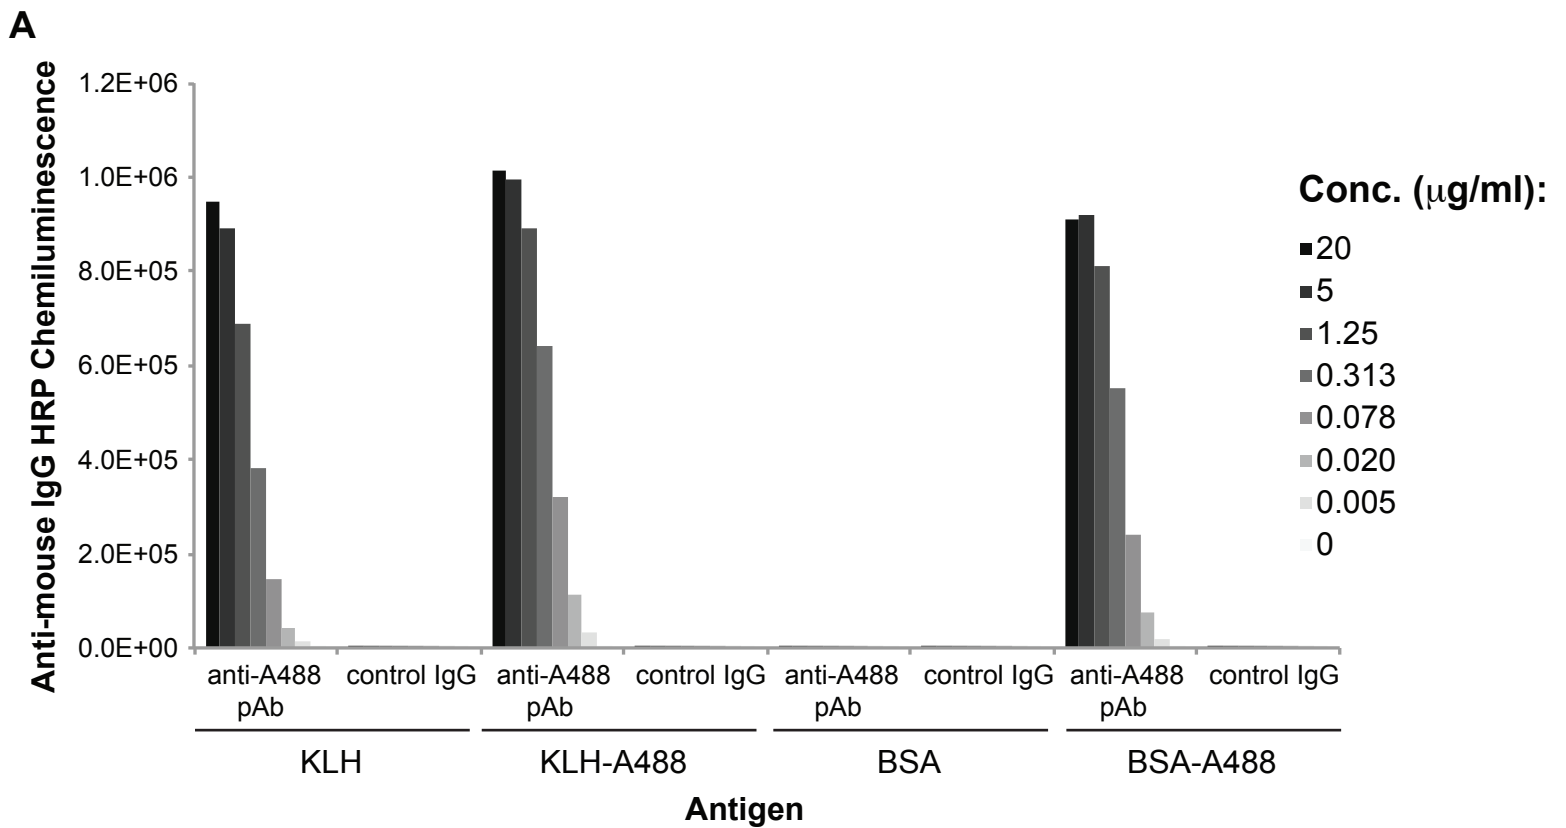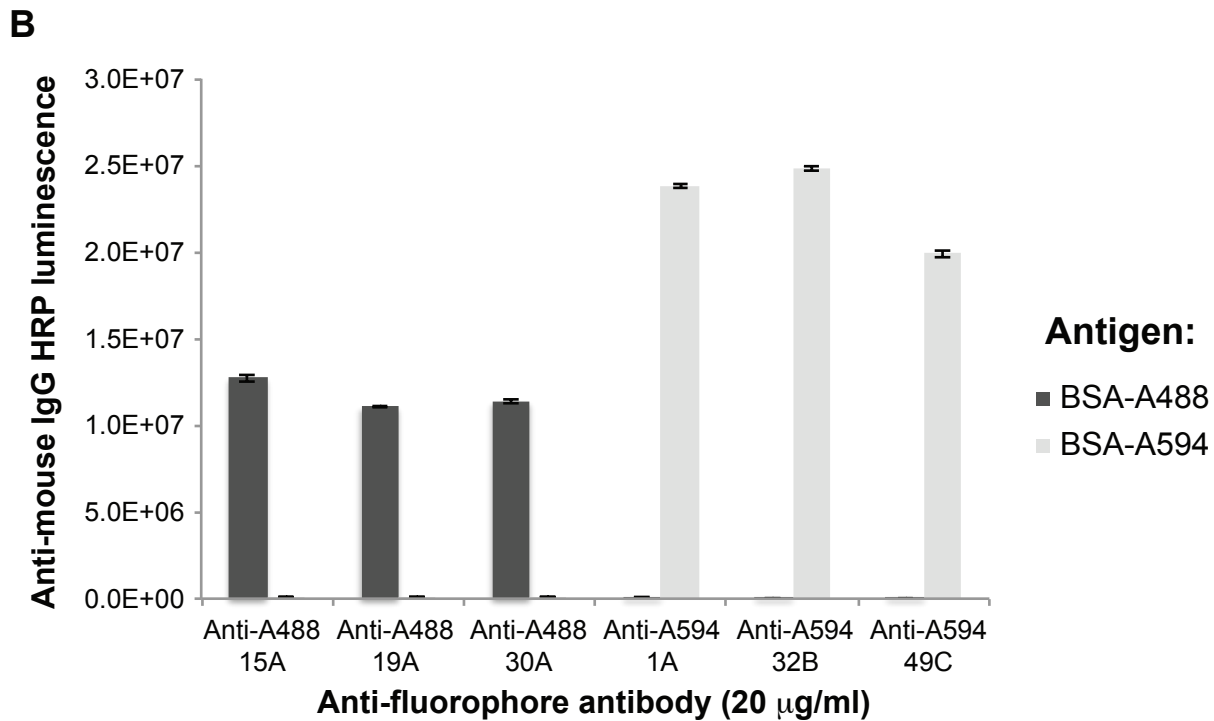

### S3 Fig. Specificity of anti-Alexa Fluor antibodies.

(A) Luminescence-based binding of the quenching benchmark, a rabbit anti-A488 polyclonal antibody preparation, to keyhole limpet hemocyanin protein (KLH) and A488, coupled to either KLH or bovine serum albumin (BSA). A 7-point titration of the anti-A488 polyclonal starting at 20  $\mu\text{g/ml}$  on KLH, KLH-A488, BSA and BSA-A488.

(B) The anti-A488 and anti-A594 mAbs do not cross-react with A594 and A488, respectively. Luminescence-based binding of the prioritized anti-A488 and anti-A594 antibody supes to BSA-A488 and BSA-A594.
