# Supplementary material for: Quantitative Assessment of Antibody Internalization with Novel Monoclonal Antibodies against Alexa Fluorophores
Source: PubMed Central journal article supplement (PMC4403856; doi:10.1371/journal.pone.0124708), 2015-04-20
Supplement: pone.0124708.s004.pdf [file pone.0124708.s004.pdf]

**A**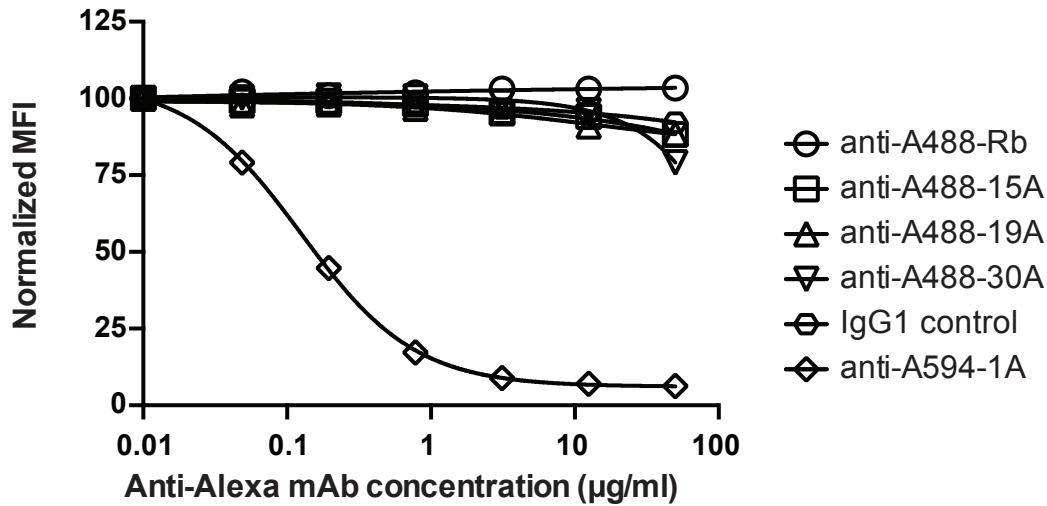**B**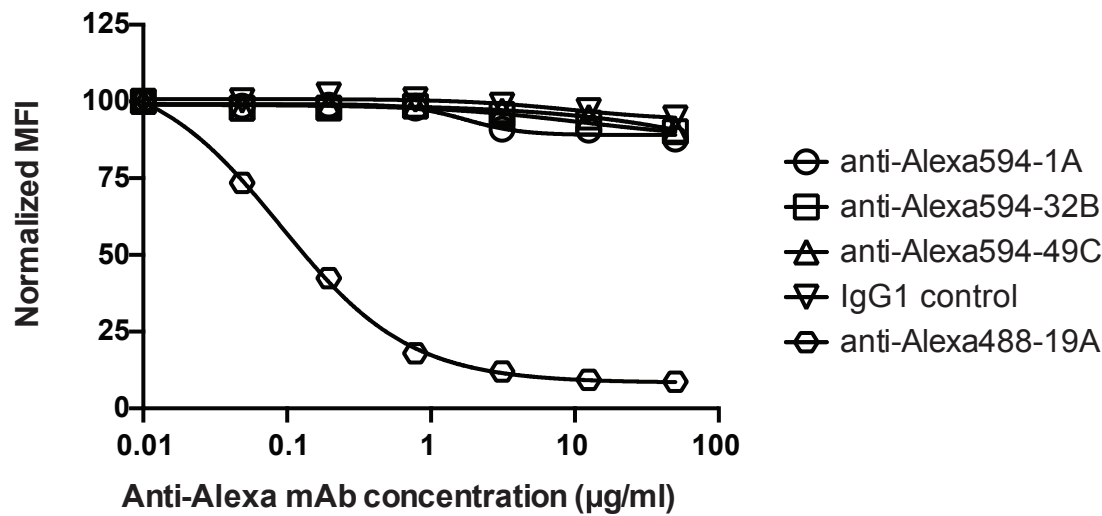

#### S4 Fig. Specific quenching activity of anti-Alexa Fluor mAbs.

(A) Fluorescence of A594 on microbeads coated with 1C1-A594 was quenched with a titration of the benchmark, a rabbit anti-A488 polyclonal, or 1 of 3 anti-A488 mAbs, or the positive control anti-A594-1A. (B) Fluorescence of A488 on microbeads coated with 1C1-A488 was quenched with a titration of 1 of 3 anti-A594 mAbs, or the positive control anti-A488-19A. (A, B) Median fluorescence intensities (MFIs) at each anti-A488 or anti-A594 mAb concentration were normalized against a buffer control. An IgG1 was used as a non-quenching mAb control.
