# Supplementary material for: Quantitative Assessment of Antibody Internalization with Novel Monoclonal Antibodies against Alexa Fluorophores
Source: PubMed Central journal article supplement (PMC4403856; doi:10.1371/journal.pone.0124708), 2015-04-20
Supplement: pone.0124708.s005.pdf [file pone.0124708.s005.pdf]

## Anti-A594 mAbs

|        |                                                                                                                                                                                                                                                                                                                                                                                                                     |
|--------|---------------------------------------------------------------------------------------------------------------------------------------------------------------------------------------------------------------------------------------------------------------------------------------------------------------------------------------------------------------------------------------------------------------------|
| 1A HC  | ATGTA CT TGGGACTGAACTGTGTATTCATAGTTTTCTCTTAAAAGGTGCCAGAGTGAAGTGAAGCTTGAGGAGTCTGGAGGAGGCTTGGTGCAACCTGGAGGATCCATGAAACTCTCTTGTGCTGCCTCTGGATTCACTTTTGTAGTGACGCCTGGATGGACTGGGTCCGCCAGTCTCCAGAGAAGGGGCTTGAGTGGGTTGCTGAAATTAGAAACAAAGCTAATAATCATGCAACATACTATGCTGAGTCTGTGAAAGGGAGGTTCAACCATCTCAAGAGATGATTCCAAAAGTAGTGTCTACCTGCAAATGAATAGCTTAAGAGCTGAAGACACTGGCATTATTACTGTACGTCGGTCTGGCTTACTGGGGCCAAGGGACTCTGGTCACTGTCTCTGCA |
| 1A LC  | ATGAAGTTGCCTGTTAGGCTGTTGGTGCTGATGTTCTGGATTCCCTGCTTCCAGCAGTGATGTTGTGATGACCCAAACTCCACTCTCCCTGCCTGTCAGTCTTGGAGATCAAGCCTCCATCTCTTGCAGATCTAGTCAGAGCCTTGACACAGTAATGGAAACACCTATTTACATTGGTACCTGCAGAAGCCAGGCCAGTCTCCAAAGCTCCTGATCTACAAAGTTTCCAACCGATTTTCTGGGGTCCCAGACAGGTTTCAGTGGCAGTGGATCAGGGACAGATTTCACTCAAGATCAGCAGAGTGGAGGCTGAGGATCTGGGAGTTTATTTCTGCTCTCAAAGTACACATGTTCCGCTCACGTTCCGGTGCTGGACCAAGCTGGAGCTGAAA            |
| 32B HC | ATGGGATGGAGCTGGATCTTTCTCTCTTCTGTCAGGAACTGCAGGTGTCTCTCTGAGGTCCAGCTGCAACAGTCTGGACCTGAGCTGGTGAAGCCTGGGGCTTCAGTGAAGATACCCTGCAAGGCTTCTGGATACACATTCAGTACTACAACATGGACTGGGTAAAGCAGAGCCATGGAAAGAGCCTTGAGTGGATTGGAGATTAATCCTAACAAATGGTGGTCTTACTACAACAGAAAGTTCAAGGGCAAGGCCACATTGACTATAGACAAGTCTCCAGCACAGCCTACATGGAGCTCCGACGCTGACATCTGAGGACACTGCAGTCTATTACTGTGCAGGCCGGTGGTTTCTTACTGGGGCCAAGGGACTCTGGTCACTGTCTCTGCA              |
| 32B LC | ATGAAGTTGCCTGTTAGGCTGTTGGTGCTGATGTTCTGGATTCCCTGCTTCCAGCAGTGATGTTGTGATGACCCAAACTCCACTCTCCCTGCCTGTCAGTCTTGGAGATCAAGCCTCCATCTCTTGCAGATCTAGTCAGAGCCTTGACACAGTAATGGAAACACCTATTTACATTGGTACCTGCAGAAGCCAGGCCAGTCTCCAAAGCTCCTGATCTACAAAGTTTCCAACCGATTTTCTGGGGTCCCAGACAGGTTTCAGTGGCAGTGGATCAGGGACAGATTTCACTCAAGATCAGCAGAGTGGAGGCTGAGGATCTGGGAGTTTATTTCTGCTCTCAAAGTACACATGTTCCGTACACGTTCCGAGGGGGGACCAAGCTGGAAATAAAA            |
| 49C HC | ATGGGATGGAGCTCTATCATCTCTTCTTGGTAGCAACAGCCTCAGGTGTCCACTCCCAGGTCCAAGTGCAGCAACCTGGGTCTGAGCTGGTGAGGCCTGGAGCTTCAGTGAAGCTGCCTGCAAGGCTTCTGGCTACACATTCACCAGTACTGGATGGACTGGGTGAAGCAGAGGCCTGGACAAGGCCTTGAGTGGATTGGAAATATTTATCTGGTAGTGGTAGTACTAACTACGATGAGAAGTTCAAAGCAAGGCCACACTGACTGTAGACACATCTCCAGCACAGCCTACATGCAGCTCAGCAGCCTGACATCTGAGGACTCTGCGGTCTATTACTGTACCTGTACCTGGTTTCTTACTGGGGCCAAGGGACTCTGGTCACTGTCTCTGCA            |
| 49C LC | ATGAAGTTGCCTGTTAGGCTGTTGGTGCTGATGTTCTGGATTCCCTGCTTCCAGCAGTGATGTTGTGATGACCCAAACTCCACTCTCCCTGCCTGTCAGTCTTGGAGATCAAGCCTCCATCTCTTGCAGATCTAGTCAGAGCCTTGACACAGTAATGGAAACACCTATTTACATTGGTACCTGCAGAAGCCAGGCCAGTCTCCAAAGCTCCTGATCTACAAAGTTTCCAACCGATTTTCTGGGGTCCCAGACAGGTTTCAGTGGCAGTGGATCAGGGACAGATTTCACTCAAGATCAGCAGAGTGGAGGCTGAGGATCTGGGAGTTTATTTCTGCTCTCAAAGTACACATGTTCCGTACACGTTCCGAGGGGGGACCAAGCTGGAAATAAAA            |
